# Supplementary material
Source: MDPI journal article supplement (https://www.mdpi.com/1996-1073/11/9/2345)

## Supplementary

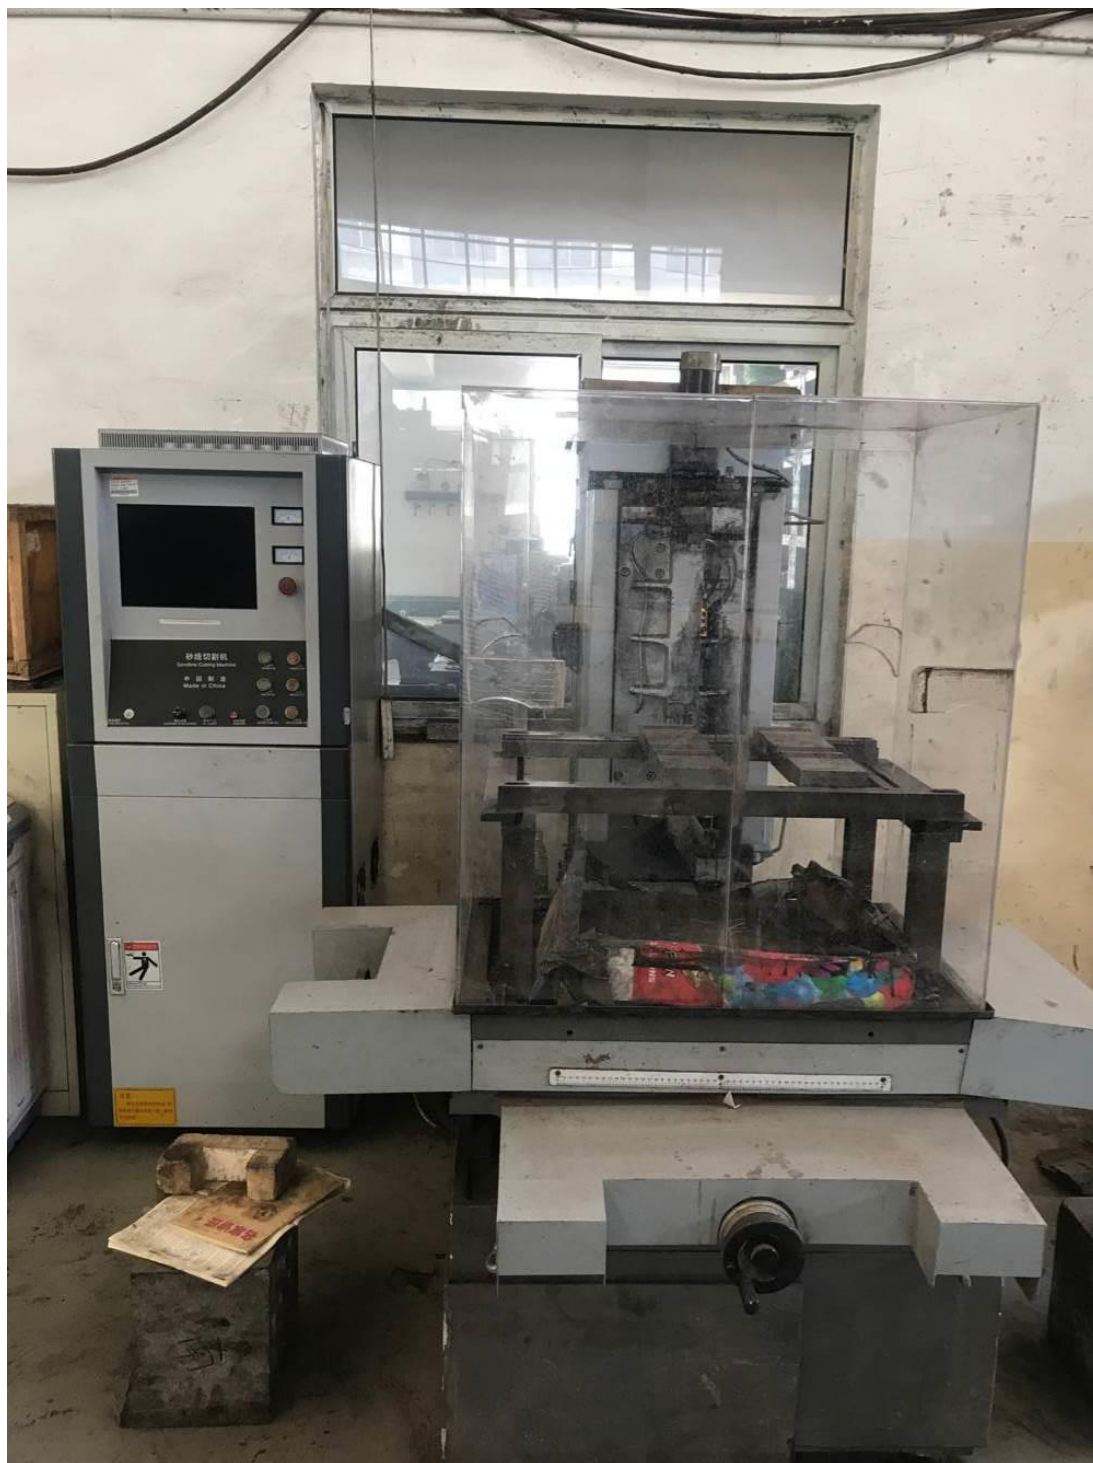

**Figure S1.** Picture of abrasive wire sawing machine.

Supplement: s1 [file s1]
